# Supplementary material for: A three-step change in uniaxial negative thermal expansion by switching supramolecular motion modes in a ferromagnetically coupled nickel dithiolate lattice
Source: Royal Society of Chemistry journal article supplement (doi:10.1039/d4tc03992k), 2024-01-01
Supplement: d4tc03992k1.pdf [file d4tc03992k1.pdf]

## Supporting Information

### **Three-Step Change in Uniaxial Negative Thermal Expansion by Switching Supramolecular Motion Modes in Ferromagnetically-Coupled Nickel Dithiolate Lattice**

Masato Haneda, Kiyonori Takahashi,\* Naohiro Hasuo, Rui-Kang Huang, Chen Xue,  
Jia-bing Wu, Shin-ichiro Noro, and Takayoshi Nakamura\*

E-mail: ktakahashi@es.hokudai.ac.jp (K. Takahashi), tnaka@es.hokudai.ac.jp (T. Nakamura)

## §Experimental Section

### General.

All reagents purchased were used without further purification. Elemental analyses were carried out by using a CHN analyzer (CE440, Exeter Analytical, Inc.) at Global Facility Center, Hokkaido University.

### Synthesis.

Precursor of  $(\text{TBA}^+)[\text{Ni}(\text{dmit})_2]^-$  ( $\text{TBA}^+$  = tetra-*n*-butylammonium<sup>+</sup>) was prepared using a procedure reported in the literature.<sup>S1</sup> A 42 %  $\text{HBF}_4$  (602 mg, 2.88 mmol) was added to a solution of 2,2'-oxybis(ethylamine) (407 mg, 1.44 mmol) in  $\text{CH}_3\text{CN}$  (2 mL). The mixture solution was stirred at r.t. for 1 h. The solvent was removed under reduced pressure to obtain a white solid. The solid was recrystallized by  $\text{CHCl}_3/\text{CH}_3\text{OH}$  to obtain a  $((^+\text{H}_3\text{N}-\text{C}_2\text{H}_4)_2\text{O})(\text{BF}_4^-)_2$ . A solution of  $(\text{TBA}^+)[\text{Ni}(\text{dmit})_2]^-$  (20 mg, 0.04 mmol) in  $\text{CH}_3\text{CN}$  (20 mL) was added to a solution of [18]crown-6 (94 mg, 0.35 mmol) and  $((^+\text{H}_3\text{N}-\text{C}_2\text{H}_4)_2\text{O})(\text{BF}_4^-)_2$  (37 mg, 0.13 mmol) in  $\text{CH}_3\text{CN}$  (19 mL) and  $\text{CH}_3\text{OH}$  (1 mL). Crystal **1** was obtained by slow diffusion over a period of 4 days. Elemental analysis for crystal **1**: calcd. for  $\text{C}_{40}\text{H}_{62}\text{N}_2\text{Ni}_2\text{O}_{13}\text{S}_{20}$  : C: 31.25%, H: 4.06%, N: 1.82%, Found : C: 30.97%, H: 3.93%, N: 1.73%.

### Crystal structure determination.

Temperature-dependent structural analysis of the single crystal **1** was performed using a Rigaku XtaLAB-Synergy diffractometer with a HyPix-6000 area detector and multilayer mirror-monochromated Mo  $K\alpha$  radiation ( $\lambda = 0.71073 \text{ \AA}$ ). A single

crystal was mounted on a MicroMounts™ tip (MiTeGen) with Paratone 8277 (Hampton Research). The temperature dependence was measured using the same crystal. For the reflection data, multi-scan absorption corrections were applied to the crystal. Data collection was performed and processed using the CrysAlisPRO interface (Oxford Diffraction, Agilent Technologies UK Ltd). The initial structure was solved using SHELXT,<sup>S2</sup> and structural refinement was performed using OLEX2 software.<sup>S3</sup> Anisotropic refinement was applied to all atoms, except for the hydrogen atoms. Cif files are deposited in Cambridge The Cambridge Crystallographic Data Centre (CCDC) with CCDC numbers 2384649, 2384650, 2384651, 2384652, 2384653, 2384654, 2384655, 2384656, 2384657, 2384658, 2384659, 2384660, 2384661, and 2384662 for crystal **1** at 113, 123, 133,143, 153, 163, 173, 183, 193, 213, 233, 253, 273, and 293 K, respectively. The CLTE was calculated using the *PASCal* web program based on the unit cell parameters at each temperature.<sup>S4</sup>

### **Physical Property Measurements.**

Differential scanning calorimetry (DSC) measurements were carried out using a Q2000 differential scanning calorimeter (TA Instruments) in the temperature range from 180 to 300 K at a scanning rate of 5 K min<sup>-1</sup> under a flow of N<sub>2</sub> gas (50 mL min<sup>-1</sup>). Temperature- and frequency-dependence of dielectric constant was measured using an impedance analyzer 4294A (Agilent) with the four-probe AC impedance method at a frequency range of 10<sup>3</sup>–10<sup>4</sup> Hz. The temperature was controlled using cryostats with temperature controller models 331 (Lake Shore Cryotronics Inc.). Electrical contacts were prepared using a silver paste (D-500,

Fujikura Kasei Co.,Ltd.) to attach the 25  $\mu\text{m}$   $\phi$  gold wires to the single crystal. The temperature-dependent molar magnetic susceptibility ( $\chi_m$ ) for polycrystalline sample of **1** was measured using a Quantum Design MPMS-3 SQUID magnetometer. Prior to sample measurement, the magnetic susceptibility of the sample holder (aluminum film) was measured under identical conditions, then the susceptibility of the holder was subtracted from the gram susceptibility as the paramagnetic contribution. The diamagnetic component in the sample was subtracted based on Pascal's constant,  $-7.1674 \times 10^{-4} \text{ cm}^3 \text{ mol}^{-1}$ .<sup>S5</sup> A magnetic field of 1 T was applied for all temperature-dependent measurements. Molecular weight of 1537.52  $\text{g mol}^{-1}$  (the  $\chi_m$  for two  $[\text{Ni}(\text{dmit})_2]^-$  molecules) was used for calculation of  $\chi_m$  of crystal **1**.

### **Theoretical calculation**

The extended Hückel molecular orbital method within the tight-binding approximation was applied to calculate the transfer integral ( $t$ ) data between the  $[\text{Ni}(\text{dmit})_2]^-$  anions in crystal **1**. The lowest unoccupied molecular orbital of the  $[\text{Ni}(\text{dmit})_2]^-$  molecule was used as the basis function. According to the literature, semiempirical parameters for Slater-type atomic orbitals were obtained.<sup>S6</sup> The  $t$  values between each pair of molecules were assumed to be proportional to the overlap integral ( $S$ ) according to the equation  $t = -10S$  (eV).

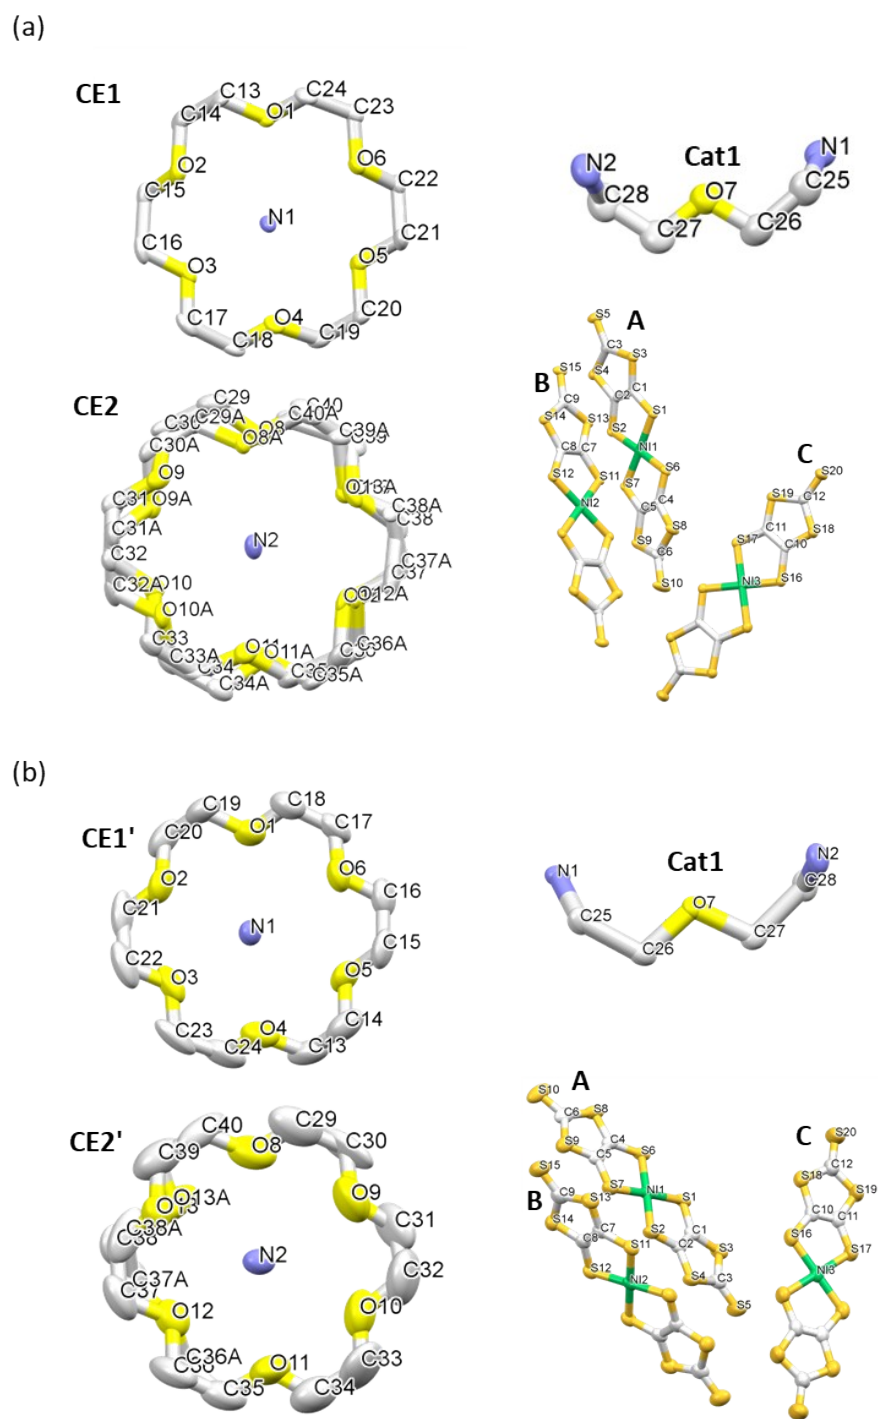

**§Table S1.** Distances and angles for N-H...O hydrogen bonding.

| <b>Contacted atoms</b> |                             |                             |                            |                             |                             |                            |
|------------------------|-----------------------------|-----------------------------|----------------------------|-----------------------------|-----------------------------|----------------------------|
| <i>T</i> / K           | N1-H1B...O1                 |                             |                            | N1-H1C...O3                 |                             |                            |
|                        | <b>N...O</b><br>distance(Å) | <b>H...O</b><br>distance(Å) | <b>N-H...O</b><br>angle(°) | <b>N...O</b><br>distance(Å) | <b>H...O</b><br>distance(Å) | <b>N-H...O</b><br>angle(°) |
| 113                    | 2.881(3)                    | 2.019                       | 157.700                    | 2.911(4)                    | 2.085                       | 150.5                      |
| 123                    | 2.881(3)                    | 2.017                       | 158.070                    | 2.91(4)                     | 2.083                       | 150.56                     |
| 133                    | 2.883(3)                    | 2.018                       | 158.260                    | 2.912(4)                    | 2.085                       | 150.49                     |
| 143                    | 2.881(3)                    | 2.023                       | 156.730                    | 2.909(4)                    | 2.086                       | 149.8                      |
| 153                    | 2.880(3)                    | 2.023                       | 156.550                    | 2.91(4)                     | 2.087                       | 149.73                     |
| 163                    | 2.883(3)                    | 2.028                       | 155.910                    | 2.912(4)                    | 2.093                       | 149.11                     |
| 173                    | 2.883(3)                    | 2.035                       | 154.500                    | 2.913(4)                    | 2.098                       | 148.44                     |
| 183                    | 2.881(4)                    | 2.029                       | 155.280                    | 2.913(4)                    | 2.095                       | 148.92                     |
| 193                    | 2.881(4)                    | 2.039                       | 153.230                    | 2.916(4)                    | 2.106                       | 147.76                     |
| 213                    | 2.918(6)                    | 2.111                       | 148.730                    | 2.888(5)                    | 2.044                       | 155.88                     |
| 233                    | 2.917(4)                    | 2.122                       | 146.840                    | 2.885(4)                    | 2.055                       | 152.88                     |
| 253                    | 2.920(4)                    | 2.130                       | 145.910                    | 2.887(4)                    | 2.068                       | 150.9                      |
| 273                    | 2.924(5)                    | 2.144                       | 145.910                    | 2.892(5)                    | 2.081                       | 151.07                     |
| 293                    | 2.916(5)                    | 2.138                       | 145.760                    | 2.898(5)                    | 2.086                       | 151.34                     |

  

| <b>Contacted atoms</b> |                             |                             |                            |                             |                             |                            |
|------------------------|-----------------------------|-----------------------------|----------------------------|-----------------------------|-----------------------------|----------------------------|
| <i>T</i> / K           | N1-H1A...O5                 |                             |                            | N2-H2C...O8                 |                             |                            |
|                        | <b>N...O</b><br>distance(Å) | <b>H...O</b><br>distance(Å) | <b>N-H...O</b><br>angle(°) | <b>N...O</b><br>distance(Å) | <b>H...O</b><br>distance(Å) | <b>N-H...O</b><br>angle(°) |
| 113                    | 2.917(4)                    | 2.04                        | 161.4                      | 2.99(2)                     | 2.15                        | 154.8                      |
| 123                    | 2.918(4)                    | 2.039                       | 161.96                     | 2.987(2)                    | 2.143                       | 153.68                     |
| 133                    | 2.92(4)                     | 2.041                       | 162.18                     | 2.973(2)                    | 2.136                       | 152.52                     |
| 143                    | 2.914(4)                    | 2.039                       | 160.87                     | 2.987(2)                    | 2.146                       | 153.32                     |
| 153                    | 2.914(4)                    | 2.039                       | 160.91                     | 2.973(2)                    | 2.13                        | 153.73                     |
| 163                    | 2.917(4)                    | 2.043                       | 160.63                     | 2.989(2)                    | 2.152                       | 152.54                     |
| 173                    | 2.917(4)                    | 2.049                       | 159.12                     | 2.994(2)                    | 2.18                        | 148.58                     |
| 183                    | 2.917(4)                    | 2.046                       | 159.77                     | 2.979(2)                    | 2.158                       | 149.53                     |
| 193                    | 2.917(4)                    | 2.054                       | 157.79                     | 2.988(2)                    | 2.187                       | 146.5                      |
| 213                    | 2.919(5)                    | 2.056                       | 160.33                     | 2.946(7)                    | 2.178                       | 142.96                     |
| 233                    | 2.927(4)                    | 2.075                       | 157.47                     | 2.954(6)                    | 2.19                        | 142.26                     |
| 253                    | 2.927(4)                    | 2.082                       | 156.02                     | 2.948(6)                    | 2.207                       | 139.3                      |
| 273                    | 2.932(5)                    | 2.097                       | 155.71                     | 2.954(6)                    | 2.211                       | 140.68                     |

|     |          |       |        |          |       |        |
|-----|----------|-------|--------|----------|-------|--------|
| 293 | 2.925(5) | 2.086 | 156.61 | 2.952(6) | 2.216 | 139.73 |
|-----|----------|-------|--------|----------|-------|--------|

**Contacted atoms**

| <i>T</i> / K | N2-H2A•••O10                |                             |                            | N2-H2B•••O12                |                             |                            |
|--------------|-----------------------------|-----------------------------|----------------------------|-----------------------------|-----------------------------|----------------------------|
|              | <b>N•••O</b><br>distance(Å) | <b>H•••O</b><br>distance(Å) | <b>N-H•••O</b><br>angle(°) | <b>N•••O</b><br>distance(Å) | <b>H•••O</b><br>distance(Å) | <b>N-H•••O</b><br>angle(°) |
| 113          | 2.918(9)                    | 2.112                       | 147.1                      | 2.88(2)                     | 2.02                        | 158.8                      |
| 123          | 2.924(1)                    | 2.122                       | 146.32                     | 2.888(2)                    | 2.022                       | 158.42                     |
| 133          | 2.948(1)                    | 2.151                       | 145.67                     | 2.824(2)                    | 1.959                       | 157.99                     |
| 143          | 2.945(1)                    | 2.147                       | 145.88                     | 2.884(2)                    | 2.024                       | 156.97                     |
| 153          | 2.948(1)                    | 2.15                        | 146.04                     | 2.893(2)                    | 2.036                       | 156.22                     |
| 163          | 2.958(1)                    | 2.165                       | 145.14                     | 2.886(3)                    | 2.032                       | 155.67                     |
| 173          | 2.95(1)                     | 2.177                       | 142.42                     | 2.929(2)                    | 2.08                        | 154.75                     |
| 183          | 2.971(1)                    | 2.189                       | 143.62                     | 2.924(3)                    | 2.088                       | 152.34                     |
| 193          | 2.984(1)                    | 2.215                       | 141.82                     | 2.89(2)                     | 2.066                       | 150.09                     |
| 213          | 2.919(7)                    | 2.097                       | 151.31                     | 2.881(5)                    | 2.089                       | 146.44                     |
| 233          | 2.918(7)                    | 2.103                       | 150.12                     | 2.891(5)                    | 2.105                       | 145.34                     |
| 253          | 2.923(7)                    | 2.13                        | 146.59                     | 2.895(5)                    | 2.138                       | 141.19                     |
| 273          | 2.892(7)                    | 2.081                       | 151.07                     | 2.889(5)                    | 2.128                       | 142.93                     |
| 293          | 2.898(7)                    | 2.086                       | 151.34                     | 2.90(5)                     | 2.149                       | 141.57                     |

**Contacted atoms**

| <i>T</i> / K | N2-H2C•••O8A                |                             |                            | N2-H2A•••O10A               |                             |                            |
|--------------|-----------------------------|-----------------------------|----------------------------|-----------------------------|-----------------------------|----------------------------|
|              | <b>N•••O</b><br>distance(Å) | <b>H•••O</b><br>distance(Å) | <b>N-H•••O</b><br>angle(°) | <b>N•••O</b><br>distance(Å) | <b>H•••O</b><br>distance(Å) | <b>N-H•••O</b><br>angle(°) |
| 113          | 2.74(2)                     | 1.86                        | 160.5                      | 2.94(1)                     | 2.06                        | 163                        |
| 123          | 2.761(2)                    | 1.89                        | 159.56                     | 2.929(1)                    | 2.048                       | 162.49                     |
| 133          | 2.767(2)                    | 1.9                         | 158.45                     | 2.915(1)                    | 2.036                       | 161.83                     |
| 143          | 2.742(2)                    | 1.876                       | 158.38                     | 2.905(1)                    | 2.027                       | 161.8                      |
| 153          | 2.756(2)                    | 1.888                       | 158.71                     | 2.90(2)                     | 2.021                       | 161.9                      |
| 163          | 2.741(2)                    | 1.878                       | 157.65                     | 2.889(2)                    | 2.017                       | 160.21                     |
| 173          | 2.728(2)                    | 1.877                       | 154.72                     | 2.895(2)                    | 2.027                       | 158.94                     |
| 183          | 2.75(3)                     | 1.896                       | 155.22                     | 2.866(2)                    | 1.994                       | 159.84                     |
| 193          | 2.743(3)                    | 1.903                       | 152.66                     | 2.868(2)                    | 2.005                       | 157.59                     |

---

| <b>Contacted atoms</b> |                             |                             |                            |
|------------------------|-----------------------------|-----------------------------|----------------------------|
| N2-H2B...O12A          |                             |                             |                            |
| <i>T</i> / K           | <b>N...O</b><br>distance(Å) | <b>H...O</b><br>distance(Å) | <b>N-H...O</b><br>angle(°) |
| 113                    | 2.95(2)                     | 2.07                        | 159.9                      |
| 123                    | 2.945(2)                    | 2.077                       | 159.16                     |
| 133                    | 3.008(2)                    | 2.146                       | 157.75                     |
| 143                    | 2.95(2)                     | 2.079                       | 159.75                     |
| 153                    | 2.93(4)                     | 2.052                       | 161.68                     |
| 163                    | 2.946(3)                    | 2.071                       | 161.01                     |
| 173                    | 2.894(3)                    | 2.039                       | 156.04                     |
| 183                    | 2.885(4)                    | 2.01                        | 161.03                     |
| 193                    | 2.929(4)                    | 2.064                       | 158.51                     |

---



**§Table S2.** Distances and angles for C-H...O interactions between crown ethers at 113 and 143 K.

| Contacted units | list of atoms                | C...O distance | H...O distance | C-H...O angle |
|-----------------|------------------------------|----------------|----------------|---------------|
| 113 K           |                              |                |                |               |
| CE1...CE1       | C16-H16B...O1                | 3.570(5)       | 2.666          | 152.04        |
| CE1...CE1       | C17-H17A...O5                | 3.628(6)       | 2.796          | 142.04        |
| CE2A...CE2A     | <sup>a</sup> C40A-H40D...O9A | 3.66(2)        | 2.794          | 146           |
| CE2B...CE2B     | C40A-H40D...O9A              | 3.61(1)        | 2.743          | 146.7         |
| CE2A...CE2A     | C29A-H29A...O13A             | 3.61(1)        | 2.764          | 143.6         |
| 143 K           |                              |                |                |               |
| CE1...CE1       | <sup>a</sup> C16-H16B...O1   | 3.576(5)       | 2.672          | 152           |
| CE2A...CE2A     | C30-H30B...O12               | 3.89(3)        | 2.987          | 145           |
| CE2A...CE2A     | C39-H39A...O10               | 3.66(2)        | 2.805          | 152           |
| CE2B...CE2B     | C40A-H40D...O9A              | 3.61(1)        | 2.734          | 147.9         |
| CE2B...CE2B     | C29A-H29C...O13A             | 3.62(1)        | 2.775          | 143.2         |

<sup>a</sup> C-H...O interactions in a complementary manner.

**§Table S3.** Distance between sulfur•••sulfur atoms less than the sum of the van der Waals radii of two sulfur between two [Ni(dmit)<sub>2</sub>] anions.

| <i>T</i> / K | Contacted units                      |          |          |          |           |
|--------------|--------------------------------------|----------|----------|----------|-----------|
|              | A•••A                                |          | A•••B    | A•••C    | B•••C     |
|              | Distance between contacted atoms / Å |          |          |          |           |
|              | S7•••S9                              | S7•••S7  | S3•••S14 | S1•••S18 | S12•••S18 |
| 113          | 3.45(1)                              | 3.43(1)  | 3.637(1) | 3.563(2) | 3.573(2)  |
| 123          | 3.452(2)                             | 3.435(1) | 3.638(2) | 3.568(2) | 3.575(2)  |
| 133          | 3.457(2)                             | 3.441(1) | 3.639(2) | 3.575(2) | 3.577(2)  |
| 143          | 3.455(2)                             | 3.444(1) | 3.636(2) | 3.576(2) | 3.572(2)  |
| 153          | 3.459(2)                             | 3.449(1) | 3.638(2) | 3.583(2) | 3.574(2)  |
| 163          | 3.462(2)                             | 3.454(1) | 3.638(2) | 3.59(2)  | 3.574(2)  |
| 173          | 3.468(2)                             | 3.46(1)  | 3.642(2) | 3.599(2) | 3.575(2)  |
| 183          | 3.469(2)                             | 3.466(1) | 3.644(2) | 3.609(2) | 3.575(2)  |
| 193          | 3.475(2)                             | 3.473(1) | 3.645(2) | 3.621(2) | 3.576(2)  |
|              | Distance between contacted atoms / Å |          |          |          |           |
|              | S6•••S8                              | S6•••S6  | S6•••S13 | S5•••S14 | S14•••S19 |
| 213          | 3.489(2)                             | 3.491(2) | 3.637(2) | 3.835(2) | 3.581(2)  |
| 233          | 3.50(2)                              | 3.503(1) | 3.651(2) | 3.837(2) | 3.58(2)   |
| 253          | 3.507(2)                             | 3.517(1) | 3.662(2) | 3.838(2) | 3.579(2)  |
| 273          | 3.508(2)                             | 3.523(1) | 3.67(2)  | 3.844(2) | 3.579(2)  |
| 293          | 3.52(2)                              | 3.538(1) | 3.679(2) | 3.849(2) | 3.586(2)  |

**§Table S4.** Distances and angles for C-H...S interactions between cation and anion C.

| <b>Contacted atoms</b> |                          |                          |                         |
|------------------------|--------------------------|--------------------------|-------------------------|
| <i>C27-H27A...S19</i>  |                          |                          |                         |
| <i>T / K</i>           | <b>C...S distance(Å)</b> | <b>H...S distance(Å)</b> | <b>C-H...S angle(°)</b> |
| 113                    | 3.735(5)                 | 2.852                    | 148.96                  |
| 123                    | 3.74(5)                  | 2.858                    | 148.8                   |
| 133                    | 3.742(5)                 | 2.857                    | 149.18                  |
| 143                    | 3.74(5)                  | 2.853                    | 149.39                  |
| 153                    | 3.743(5)                 | 2.854                    | 149.71                  |
| 163                    | 3.749(5)                 | 2.862                    | 149.47                  |
| 173                    | 3.753(5)                 | 2.863                    | 149.92                  |
| 183                    | 3.755(5)                 | 2.865                    | 149.98                  |
| 193                    | 3.764(5)                 | 2.871                    | 150.32                  |

  

| <b>Contacted atoms</b> |                          |                          |                         |
|------------------------|--------------------------|--------------------------|-------------------------|
| <i>C27-H27B...S16</i>  |                          |                          |                         |
|                        | <b>C...S distance(Å)</b> | <b>H...S distance(Å)</b> | <b>C-H...S angle(°)</b> |
| 213                    | 3.781(5)                 | 2.897                    | 150.45                  |
| 233                    | 3.798(5)                 | 2.91                     | 151.13                  |
| 253                    | 3.804(5)                 | 2.914                    | 151.48                  |
| 273                    | 3.82(5)                  | 2.938                    | 151.83                  |
| 293                    | 3.831(5)                 | 2.945                    | 152.32                  |

**§Table S5.** Distances and angles for C-H...C interactions between cation and anion C.

| <b>Contacted atoms</b> |                          |                          |                         |
|------------------------|--------------------------|--------------------------|-------------------------|
| <b>C27-H27A...C11</b>  |                          |                          |                         |
| <b><i>T</i> / K</b>    | <b>C...C distance(Å)</b> | <b>H...C distance(Å)</b> | <b>C-H...C angle(°)</b> |
| 113                    | 3.765(6)                 | 2.82                     | 159.84                  |
| 123                    | 3.765(6)                 | 2.821                    | 159.81                  |
| 133                    | 3.764(6)                 | 2.819                    | 159.69                  |
| 143                    | 3.759(6)                 | 2.816                    | 159.42                  |
| 153                    | 3.757(6)                 | 2.814                    | 159.35                  |
| 163                    | 3.758(6)                 | 2.814                    | 159.45                  |
| 173                    | 3.759(6)                 | 2.817                    | 159.19                  |
| 183                    | 3.754(6)                 | 2.811                    | 159.41                  |
| 193                    | 3.757(6)                 | 2.815                    | 159.13                  |

  

| <b>Contacted atoms</b> |                          |                          |                         |
|------------------------|--------------------------|--------------------------|-------------------------|
| <b>C27-H27B...C10</b>  |                          |                          |                         |
|                        | <b>C...C distance(Å)</b> | <b>H...C distance(Å)</b> | <b>C-H...C angle(°)</b> |
| 213                    | 3.754(6)                 | 2.818                    | 159.8                   |
| 233                    | 3.76(6)                  | 2.823                    | 160.09                  |
| 253                    | 3.752(6)                 | 2.818                    | 159.51                  |
| 273                    | 3.761(6)                 | 2.836                    | 159.86                  |
| 293                    | 3.766(6)                 | 2.836                    | 160.78                  |

**§Table S6.** Distances and angles for C-H...S interactions between CE1 and anion A.

| <i>T</i> / K | Contacted atoms      |                      |                     |                      |                      |                     |
|--------------|----------------------|----------------------|---------------------|----------------------|----------------------|---------------------|
|              | C18-H18B...S2        |                      |                     | C20-H20A...S10       |                      |                     |
|              | C...S<br>distance(Å) | H...S<br>distance(Å) | C-H...S<br>angle(°) | C...S<br>distance(Å) | H...S<br>distance(Å) | C-H...S<br>angle(°) |
| 113          | 3.849(4)             | 2.966                | 149.08              | 3.749(5)             | 2.853                | 150.8               |
| 123          | 3.851(4)             | 2.97                 | 148.92              | 3.75(5)              | 2.852                | 151.1               |
| 133          | 3.858(4)             | 2.974                | 149.28              | 3.747(5)             | 2.85                 | 151.01              |
| 143          | 3.852(4)             | 2.971                | 148.85              | 3.738(5)             | 2.843                | 150.64              |
| 153          | 3.855(4)             | 2.974                | 148.83              | 3.737(5)             | 2.841                | 150.67              |
| 163          | 3.859(5)             | 2.981                | 148.33              | 3.737(5)             | 2.843                | 150.5               |
| 173          | 3.865(5)             | 2.985                | 148.62              | 3.731(5)             | 2.84                 | 150.11              |
| 183          | 3.864(5)             | 2.984                | 148.63              | 3.728(5)             | 2.837                | 150.11              |
| 193          | 3.864(5)             | 2.982                | 148.95              | 3.728(5)             | 2.836                | 150.18              |

  

|     | Contacted atoms      |                      |                     |                      |                      |                     |
|-----|----------------------|----------------------|---------------------|----------------------|----------------------|---------------------|
|     | C23-H23A...S4        |                      |                     | C21-H21B...S10       |                      |                     |
|     | C...S<br>distance(Å) | H...S<br>distance(Å) | C-H...S<br>angle(°) | C...S<br>distance(Å) | H...S<br>distance(Å) | C-H...S<br>angle(°) |
| 213 | 3.869(6)             | 2.994                | 149.29              | 3.718(7)             | 2.842                | 149.2               |
| 233 | 3.872(6)             | 2.996                | 149.49              | 3.718(6)             | 2.845                | 148.87              |
| 253 | 3.883(7)             | 3.006                | 149.54              | 3.711(6)             | 2.842                | 148.35              |
| 273 | 3.882(7)             | 3.011                | 150.09              | 3.706(6)             | 2.857                | 146.68              |
| 293 | 3.888(7)             | 3.018                | 149.82              | 3.706(6)             | 2.857                | 146.64              |

**§Table S7.** Distances and angles for C-H...S interactions between CE2 and anion A.

| <b>Contacted atoms</b> |                             |                             |                            |                             |                             |                            |
|------------------------|-----------------------------|-----------------------------|----------------------------|-----------------------------|-----------------------------|----------------------------|
| <i>T</i> / K           | C32-H32B...S10              |                             |                            | C35-H35B...S6               |                             |                            |
|                        | <b>C...S</b><br>distance(Å) | <b>H...S</b><br>distance(Å) | <b>C-H...S</b><br>angle(°) | <b>C...S</b><br>distance(Å) | <b>H...S</b><br>distance(Å) | <b>C-H...S</b><br>angle(°) |
| 113                    | 3.71(2)                     | 2.983                       | 131.11                     | 3.687(2)                    | 2.81                        | 148.05                     |
| 123                    | 3.709(2)                    | 2.98                        | 131.32                     | 3.683(2)                    | 2.804                       | 148.29                     |
| 133                    | 3.711(2)                    | 2.99                        | 130.53                     | 3.694(2)                    | 2.808                       | 149.17                     |
| 143                    | 3.704(2)                    | 2.984                       | 130.54                     | 3.677(2)                    | 2.792                       | 149.06                     |
| 153                    | 3.691(2)                    | 2.952                       | 132.21                     | 3.665(2)                    | 2.795                       | 146.89                     |
| 163                    | 3.699(2)                    | 2.967                       | 131.63                     | 3.665(3)                    | 2.796                       | 146.76                     |
| 173                    | 3.696(2)                    | 2.961                       | 131.88                     | 3.659(3)                    | 2.764                       | 150.62                     |
| 183                    | 3.707(2)                    | 2.988                       | 130.41                     | 3.665(3)                    | 2.784                       | 148.56                     |
| 193                    | 3.702(2)                    | 2.964                       | 132.16                     | 3.674(3)                    | 2.767                       | 152.41                     |

  

| <b>Contacted atoms</b> |                             |                             |                            |                             |                             |                            |
|------------------------|-----------------------------|-----------------------------|----------------------------|-----------------------------|-----------------------------|----------------------------|
|                        | C40-H40B...S10              |                             |                            | C36-H36B...S3               |                             |                            |
|                        | <b>C...S</b><br>distance(Å) | <b>H...S</b><br>distance(Å) | <b>C-H...S</b><br>angle(°) | <b>C...S</b><br>distance(Å) | <b>H...S</b><br>distance(Å) | <b>C-H...S</b><br>angle(°) |
| 213                    | 3.72(8)                     | 2.929                       | 138.54                     | 3.348(1)                    | 2.676                       | 126.09                     |
| 233                    | 3.738(8)                    | 2.95                        | 138.24                     | 3.349(1)                    | 2.656                       | 127.93                     |
| 253                    | 3.738(7)                    | 2.944                       | 138.83                     | 3.364(1)                    | 2.692                       | 126.19                     |
| 273                    | 3.754(8)                    | 2.976                       | 138.21                     | 3.359(1)                    | 2.689                       | 126.67                     |
| 293                    | 3.762(8)                    | 2.97                        | 139.62                     | 3.369(2)                    | 2.684                       | 128                        |

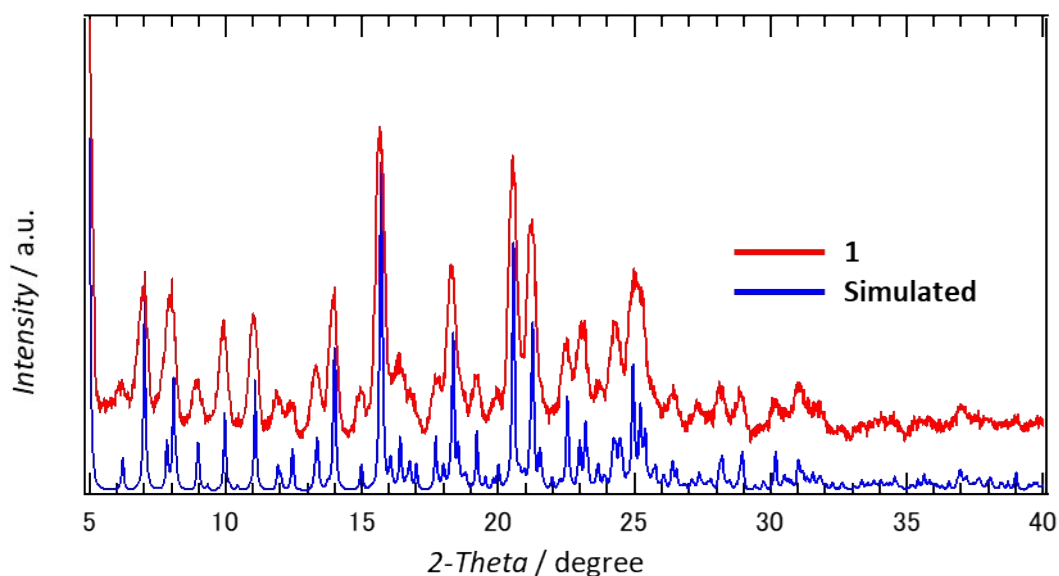

**§Figure S2.** Powder X-ray diffraction (PXRD) pattern of crystal **1** measured at room temperature. Simulated patterns were compared with the experimental ones to confirm purity of the sample.

PXRD patterns are measured with a Rigaku RINT2113 in the  $2\theta$  region of  $5-40^\circ$ . The measurements were performed with  $\text{CuK}\alpha$  radiation ( $\lambda = 1.5418 \text{ \AA}$ ) at scanning rate of  $1.2^\circ \cdot \text{min}^{-1}$  under an applied electric voltage and current of 40 KV and 40 mA, respectively.

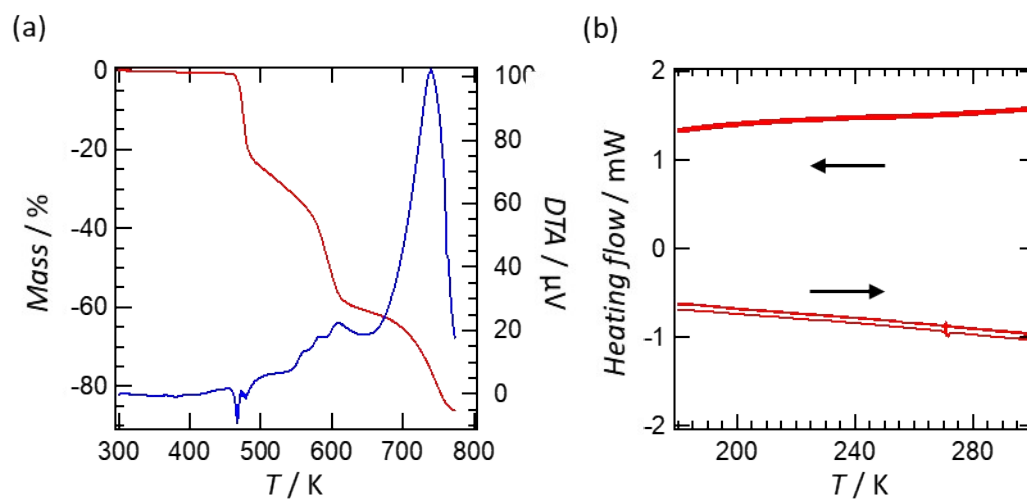

**§Figure S3.** (a) TG-DTA measurement for crystal **1**. (b) DSC from 180 to 300 K. Thermogravimetric-differential thermal analysis (TG-DTA) was conducted using a *Rigaku* Thermo Plus TG8120 with 10 K/min heating rate under nitrogen gas flow.

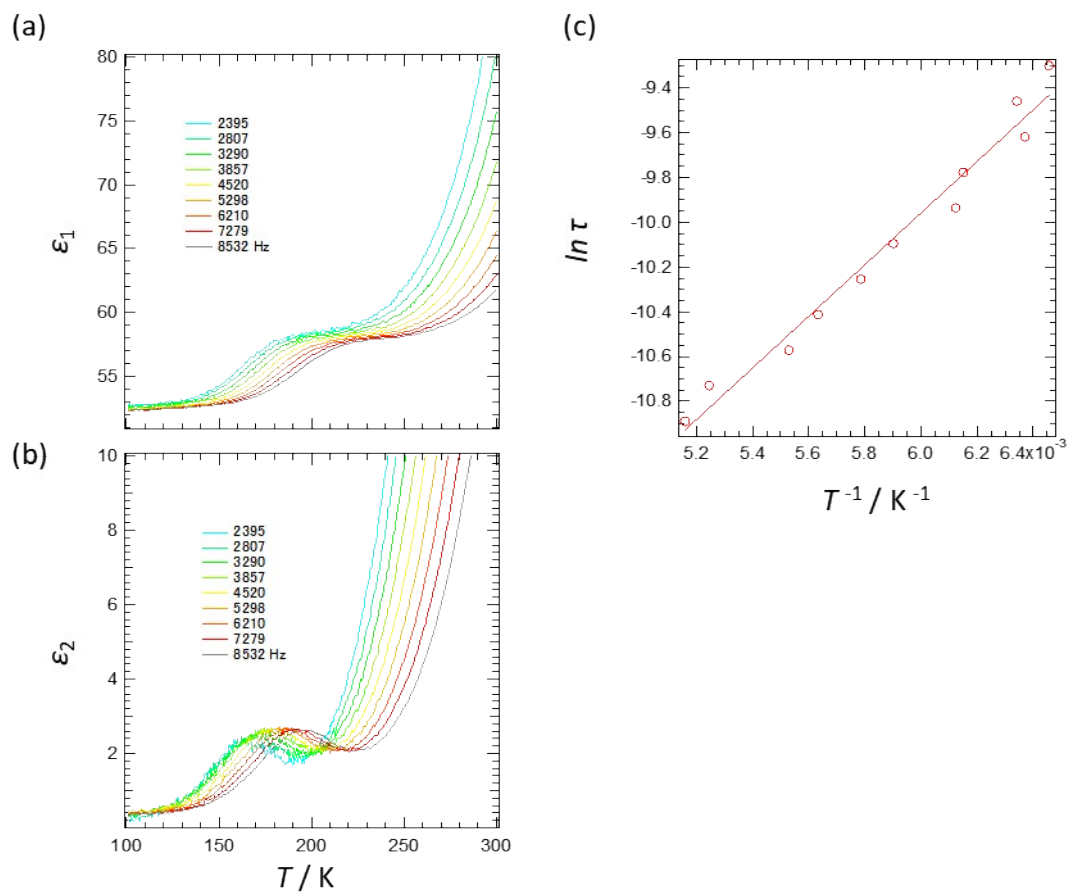

**§Figure S4.** (a) The real part and (b) imaginary part of the dielectric constant and (c) Arrhenius plot for dielectric relaxation.



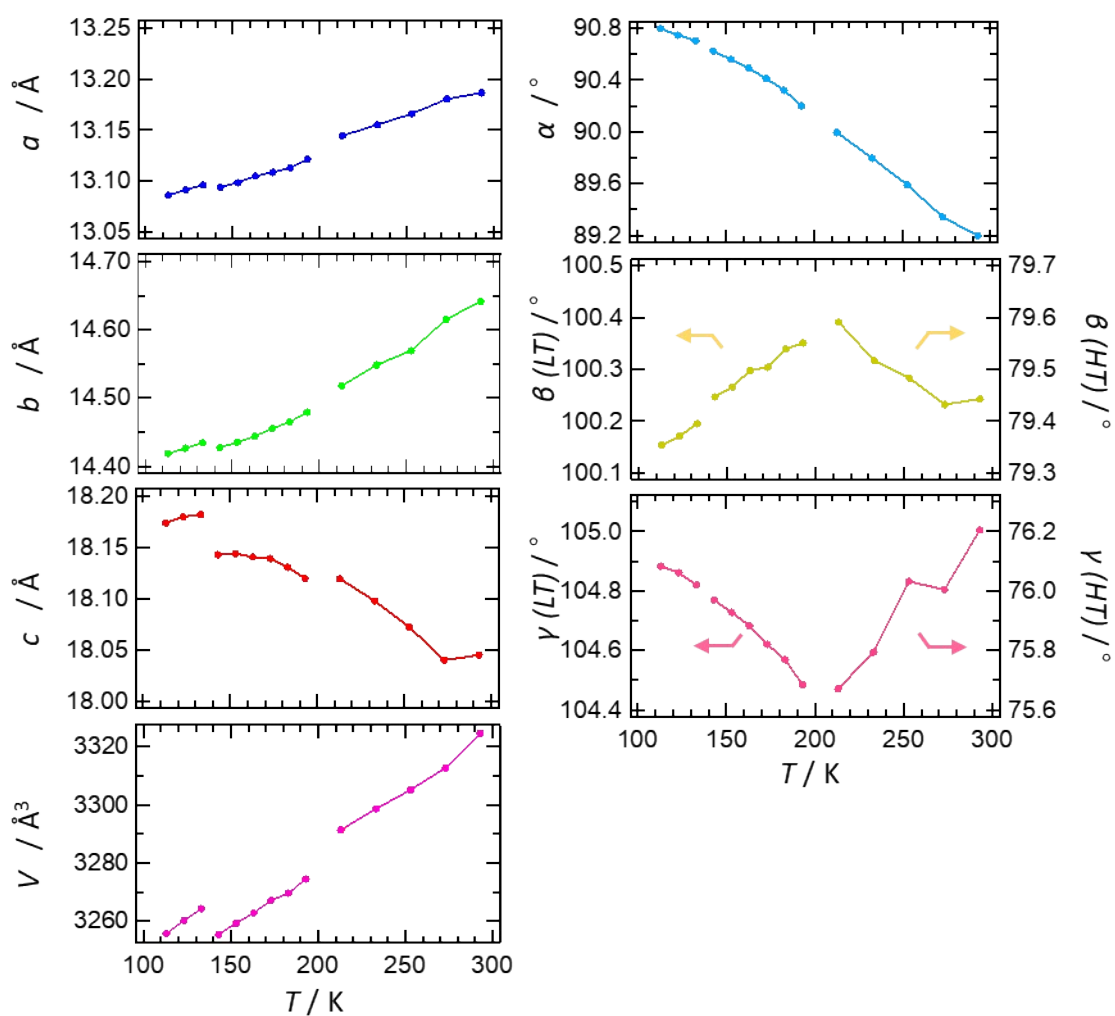

**§Figure S5.** Temperature dependence of unit cell dimensions and volume for crystal 1 over which the same crystal was studied. (HT : High Temperature phase, LT : Low Temperature phase)

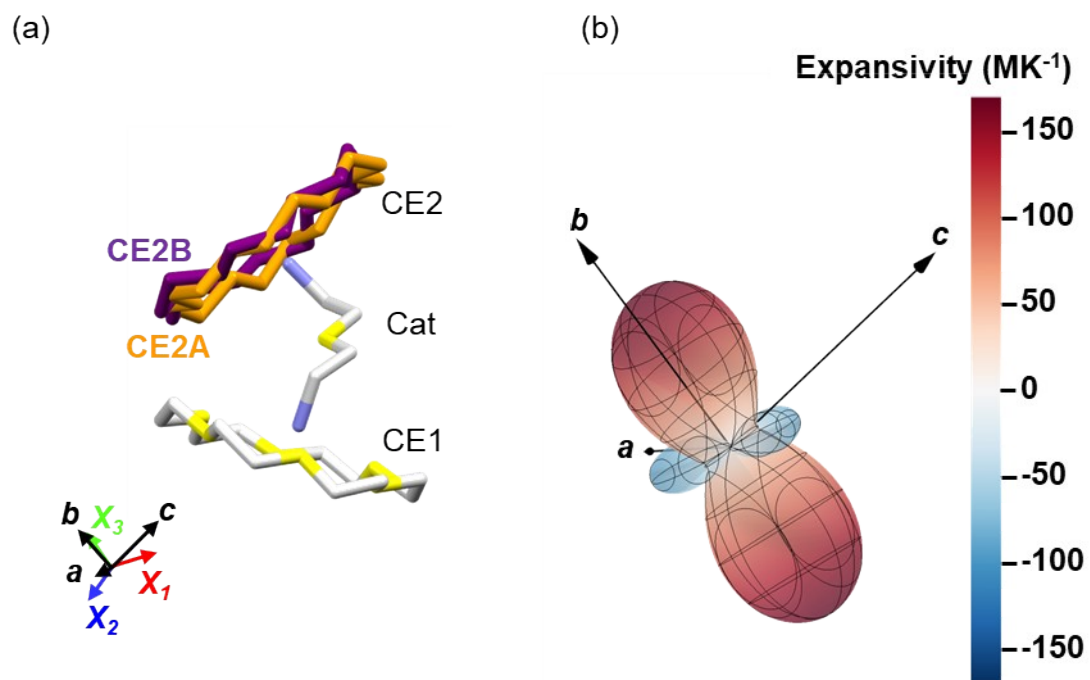

**§Figure S6.** The structure of supramolecular cations. Indicatrix plots for structural data of **1**. PASCAL indicatrix Plotter was used to plot the data. The software was obtained from the web site: <https://www.pascalapp.co.uk/>

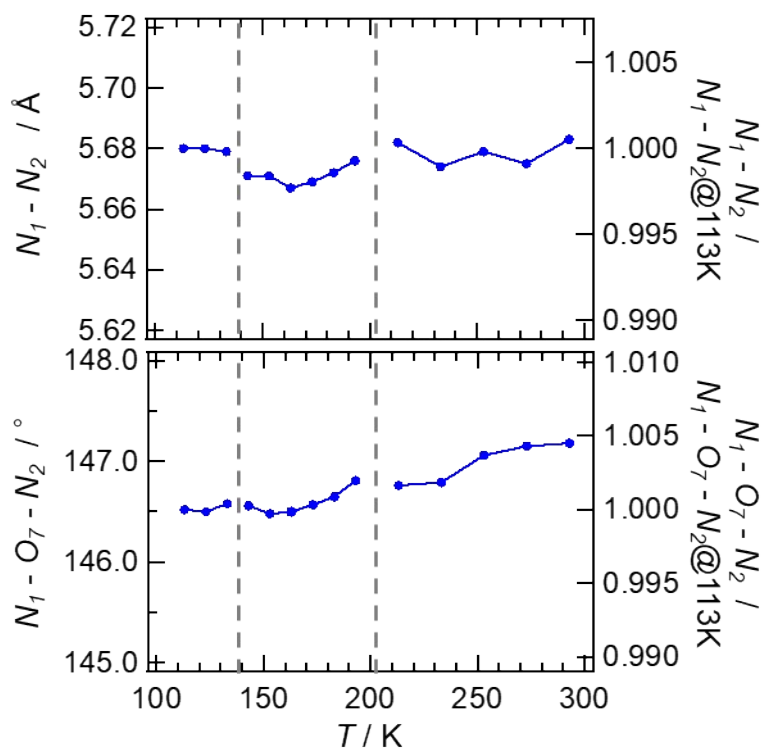

**§Figure S7.** Temperature dependence of the intramolecular N1...N2 interatomic distance and N1...O7...N2 angles (left axis) and compared with each value at 113 K (right axis) for crystal **1**.

**§Table S8.** Crystal data, data collection, and reduction parameters for crystal **1**.

| Crystal                                         | <b>1</b>                                                                                       |             |             |
|-------------------------------------------------|------------------------------------------------------------------------------------------------|-------------|-------------|
| <i>Temperature / K</i>                          | 113                                                                                            | 123         | 133         |
| <i>Crystal Dimensions / mm<sup>3</sup></i>      | 0.1×0.5×0.7                                                                                    |             |             |
| <i>Chemical formula</i>                         | C <sub>40</sub> H <sub>62</sub> N <sub>2</sub> Ni <sub>2</sub> O <sub>13</sub> S <sub>20</sub> |             |             |
| <i>Formula weight</i>                           | 1537.53                                                                                        |             |             |
| <i>Crystal system</i>                           | Triclinic                                                                                      |             |             |
| <i>Space group</i>                              | $P\bar{1}$                                                                                     |             |             |
| <i>a / Å</i>                                    | 13.0860(3)                                                                                     | 13.0913(3)  | 13.0962(3)  |
| <i>b / Å</i>                                    | 14.4188(3)                                                                                     | 14.4264(3)  | 14.4347(3)  |
| <i>c / Å</i>                                    | 18.1738(4)                                                                                     | 18.1799(4)  | 18.1822(5)  |
| <i>α / deg</i>                                  | 90.798(2)                                                                                      | 90.747(2)   | 90.702(2)   |
| <i>β / deg</i>                                  | 100.154(2)                                                                                     | 100.171(2)  | 100.195(2)  |
| <i>γ / deg</i>                                  | 104.883(2)                                                                                     | 104.861(2)  | 104.820(2)  |
| <i>V / Å<sup>3</sup></i>                        | 3255.84(13)                                                                                    | 3260.32(13) | 3264.37(14) |
| <i>Z</i>                                        | 2                                                                                              |             |             |
| <i>D<sub>calc</sub> / g·cm<sup>-3</sup></i>     | 1.568                                                                                          | 1.566       | 1.564       |
| <i>μ(Mo K<sub>α</sub>) / cm<sup>-1</sup></i>    | 1.274                                                                                          | 1.272       | 1.271       |
| <i>2θ<sub>max</sub> / deg</i>                   | 61.792                                                                                         | 61.882      | 61.828      |
| <i>Reflections measured</i>                     | 43040                                                                                          | 43134       | 43163       |
| <i>Independent reflections</i>                  | 16286                                                                                          | 16308       | 16316       |
| <i>Reflections used</i>                         | 16286                                                                                          | 16308       | 16316       |
| <i>R<sub>1</sub><sup>a</sup></i>                | 0.0508                                                                                         | 0.0523      | 0.0523      |
| <i>R<sub>w</sub>(F<sup>2</sup>)<sup>a</sup></i> | 0.1193                                                                                         | 0.1223      | 0.1223      |
| <i>GOF</i>                                      | 1.016                                                                                          | 1.019       | 1.023       |
| <i>CCDC No.</i>                                 | 2384649                                                                                        | 2384650     | 2384651     |

<sup>a</sup>  $R_1 = \Sigma||F_o| - |F_c|| / \Sigma|F_o|$  and  $R_w = (\Sigma\omega(|F_o| - |F_c|)^2 / \Sigma\omega F_o^2)^{1/2}$ .

| Crystal                                         | <b>1</b>                                                                                       |             |             |
|-------------------------------------------------|------------------------------------------------------------------------------------------------|-------------|-------------|
| <i>Temperature / K</i>                          | 143                                                                                            | 153         | 163         |
| <i>Crystal Dimensions / mm<sup>3</sup></i>      | 0.1×0.5×0.7                                                                                    |             |             |
| <i>Chemical formula</i>                         | C <sub>40</sub> H <sub>62</sub> N <sub>2</sub> Ni <sub>2</sub> O <sub>13</sub> S <sub>20</sub> |             |             |
| <i>Formula weight</i>                           | 1537.53                                                                                        |             |             |
| <i>Crystal system</i>                           | <i>Triclinic</i>                                                                               |             |             |
| <i>Space group</i>                              | <i>P</i> $\bar{1}$                                                                             |             |             |
| <i>a / Å</i>                                    | 13.0939(3)                                                                                     | 13.0985(4)  | 13.1048 (4) |
| <i>b / Å</i>                                    | 14.4272(4)                                                                                     | 14.4353(3)  | 14.4438(3)  |
| <i>c / Å</i>                                    | 18.1428(4)                                                                                     | 18.1439(5)  | 18.1407(5)  |
| <i>α / deg</i>                                  | 90.624(2)                                                                                      | 90.560(2)   | 90.492(2)   |
| <i>β / deg</i>                                  | 100.247(2)                                                                                     | 100.266(2)  | 100.298(2)  |
| <i>γ / deg</i>                                  | 104.770(2)                                                                                     | 104.728(2)  | 104.682(2)  |
| <i>V / Å<sup>3</sup></i>                        | 3255.51(13)                                                                                    | 3259.35(15) | 3262.86(15) |
| <i>Z</i>                                        | 2                                                                                              |             |             |
| <i>D<sub>calc</sub> / g·cm<sup>-3</sup></i>     | 1.568                                                                                          | 1.567       | 1.565       |
| <i>μ(Mo K<sub>α</sub>) / cm<sup>-1</sup></i>    | 1.274                                                                                          | 1.273       | 1.271       |
| <i>2θ<sub>max</sub> / deg</i>                   | 61.870                                                                                         | 61.842      | 61.836      |
| <i>Reflections measured</i>                     | 43224                                                                                          | 43335       | 43468       |
| <i>Independent reflections</i>                  | 16302                                                                                          | 16329       | 16348       |
| <i>Reflections used</i>                         | 16302                                                                                          | 16329       | 16348       |
| <i>R<sub>1</sub><sup>a</sup></i>                | 0.0524                                                                                         | 0.0532      | 0.0540      |
| <i>R<sub>w</sub>(F<sup>2</sup>)<sup>a</sup></i> | 0.1199                                                                                         | 0.1232      | 0.1235      |
| <i>GOF</i>                                      | 1.011                                                                                          | 1.032       | 1.028       |
| <i>CCDC No.</i>                                 | 2384652                                                                                        | 2384653     | 2384654     |

<sup>a</sup>  $R_1 = \sum||F_o| - |F_c|| / \sum|F_o|$  and  $R_w = (\sum\omega(|F_o| - |F_c|)^2 / \sum\omega F_o^2)^{1/2}$ .

| Crystal                                         | <b>1</b>                                                                                       |             |             |
|-------------------------------------------------|------------------------------------------------------------------------------------------------|-------------|-------------|
| <i>Temperature / K</i>                          | 173                                                                                            | 183         | 193         |
| <i>Crystal Dimensions / mm<sup>3</sup></i>      | 0.1×0.5×0.7                                                                                    |             |             |
| <i>Chemical formula</i>                         | C <sub>40</sub> H <sub>62</sub> N <sub>2</sub> Ni <sub>2</sub> O <sub>13</sub> S <sub>20</sub> |             |             |
| <i>Formula weight</i>                           | 1537.53                                                                                        |             |             |
| <i>Crystal system</i>                           | <i>Triclinic</i>                                                                               |             |             |
| <i>Space group</i>                              | <i>P</i> $\bar{1}$                                                                             |             |             |
| <i>a / Å</i>                                    | 13.1087(4)                                                                                     | 13.1130(4)  | 13.1212 (4) |
| <i>b / Å</i>                                    | 14.4553(3)                                                                                     | 14.4648(3)  | 14.4791(3)  |
| <i>c / Å</i>                                    | 18.1391(5)                                                                                     | 18.1307(5)  | 18.1199(5)  |
| <i>α / deg</i>                                  | 90.412(2)                                                                                      | 90.322(2)   | 90.200(2)   |
| <i>β / deg</i>                                  | 100.304(2)                                                                                     | 100.339(2)  | 100.351(2)  |
| <i>γ / deg</i>                                  | 104.620(2)                                                                                     | 104.569(2)  | 104.484(2)  |
| <i>V / Å<sup>3</sup></i>                        | 3267.30(15)                                                                                    | 3269.70(15) | 3274.58(15) |
| <i>Z</i>                                        | 2                                                                                              |             |             |
| <i>D<sub>calc</sub> / g·cm<sup>-3</sup></i>     | 1.563                                                                                          | 1.562       | 1.559       |
| <i>μ(Mo K<sub>α</sub>) / cm<sup>-1</sup></i>    | 1.270                                                                                          | 1.269       | 1.267       |
| <i>2θ<sub>max</sub> / deg</i>                   | 61.896                                                                                         | 61.864      | 61.730      |
| <i>Reflections measured</i>                     | 43610                                                                                          | 43704       | 43961       |
| <i>Independent reflections</i>                  | 16391                                                                                          | 16409       | 16431       |
| <i>Reflections used</i>                         | 16391                                                                                          | 16409       | 16431       |
| <i>R<sub>1</sub><sup>a</sup></i>                | 0.0544                                                                                         | 0.0551      | 0.0553      |
| <i>R<sub>w</sub>(F<sup>2</sup>)<sup>a</sup></i> | 0.1259                                                                                         | 0.1263      | 0.1281      |
| <i>GOF</i>                                      | 1.029                                                                                          | 1.029       | 1.027       |
| <i>CCDC No.</i>                                 | 2384655                                                                                        | 2384656     | 2384657     |

<sup>a</sup>  $R_1 = \Sigma||F_o| - |F_c|| / \Sigma|F_o|$  and  $R_w = (\Sigma\omega(|F_o| - |F_c|)^2 / \Sigma\omega F_o^2)^{1/2}$ .

| Crystal                                         | <b>1</b>                                                                                       |            |            |
|-------------------------------------------------|------------------------------------------------------------------------------------------------|------------|------------|
| <i>Temperature / K</i>                          | 213                                                                                            | 233        | 253        |
| <i>Crystal Dimensions / mm<sup>3</sup></i>      | 0.2×0.5×0.8                                                                                    |            |            |
| <i>Chemical formula</i>                         | C <sub>40</sub> H <sub>62</sub> N <sub>2</sub> Ni <sub>2</sub> O <sub>13</sub> S <sub>20</sub> |            |            |
| <i>Formula weight</i>                           | 1537.53                                                                                        |            |            |
| <i>Crystal system</i>                           | <i>Triclinic</i>                                                                               |            |            |
| <i>Space group</i>                              | <i>P</i> $\bar{1}$                                                                             |            |            |
| <i>a / Å</i>                                    | 13.1444(3)                                                                                     | 13.1552(4) | 13.1660(5) |
| <i>b / Å</i>                                    | 14.5178(5)                                                                                     | 14.5482(6) | 14.5697(6) |
| <i>c / Å</i>                                    | 18.1193(5)                                                                                     | 18.0978(7) | 18.0721(7) |
| <i>α / deg</i>                                  | 89.995(2)                                                                                      | 89.797(3)  | 89.590(3)  |
| <i>β / deg</i>                                  | 79.591(2)                                                                                      | 79.517(3)  | 79.483(3)  |
| <i>γ / deg</i>                                  | 75.671(2)                                                                                      | 75.794(3)  | 76.032(3)  |
| <i>V / Å<sup>3</sup></i>                        | 3291.35(17)                                                                                    | 3298.60(2) | 3305.20(2) |
| <i>Z</i>                                        | 2                                                                                              |            |            |
| <i>D<sub>calc</sub> / g·cm<sup>-3</sup></i>     | 1.551                                                                                          | 1.548      | 1.545      |
| <i>μ(Mo K<sub>α</sub>) / cm<sup>-1</sup></i>    | 1.260                                                                                          | 1.258      | 1.255      |
| <i>2θ<sub>max</sub> / deg</i>                   | 52.746                                                                                         | 52.744     | 52.744     |
| <i>Reflections measured</i>                     | 37421                                                                                          | 38461      | 38905      |
| <i>Independent reflections</i>                  | 13452                                                                                          | 13499      | 13529      |
| <i>Reflections used</i>                         | 13452                                                                                          | 13499      | 13529      |
| <i>R<sub>1</sub><sup>a</sup></i>                | 0.0551                                                                                         | 0.0521     | 0.0514     |
| <i>R<sub>w</sub>(F<sup>2</sup>)<sup>a</sup></i> | 0.1367                                                                                         | 0.1286     | 0.1276     |
| <i>GOF</i>                                      | 1.037                                                                                          | 1.044      | 1.034      |
| <i>CCDC No.</i>                                 | 2384658                                                                                        | 2384659    | 2384660    |

<sup>a</sup>  $R_1 = \Sigma||F_o| - |F_c|| / \Sigma|F_o|$  and  $R_w = (\Sigma\omega(|F_o| - |F_c|)^2 / \Sigma\omega F_o^2)^{1/2}$ .

| Crystal                                                        | 1                                                                                              |            |
|----------------------------------------------------------------|------------------------------------------------------------------------------------------------|------------|
| <i>Temperature / K</i>                                         | 273                                                                                            | 293        |
| <i>Crystal Dimensions / mm<sup>3</sup></i><br>/mm <sup>3</sup> | 0.2×0.5×0.8                                                                                    |            |
| <i>Chemical formula</i>                                        | C <sub>40</sub> H <sub>62</sub> N <sub>2</sub> Ni <sub>2</sub> O <sub>13</sub> S <sub>20</sub> |            |
| <i>Formula weight</i>                                          | 1537.53                                                                                        |            |
| <i>Crystal system</i>                                          | Triclinic                                                                                      |            |
| <i>Space group</i>                                             | $P\bar{1}$                                                                                     |            |
| <i>a / Å</i>                                                   | 13.1803(5)                                                                                     | 13.1866(5) |
| <i>b / Å</i>                                                   | 14.6150(7)                                                                                     | 14.6416(5) |
| <i>c / Å</i>                                                   | 18.0399(7)                                                                                     | 18.0448(7) |
| <i>α / deg</i>                                                 | 89.343(3)                                                                                      | 89.198(3)  |
| <i>β / deg</i>                                                 | 79.432(3)                                                                                      | 79.443(3)  |
| <i>γ / deg</i>                                                 | 76.004(4)                                                                                      | 76.205(3)  |
| <i>V / Å<sup>3</sup></i>                                       | 3312.70(2)                                                                                     | 3324.60(2) |
| <i>Z</i>                                                       | 2                                                                                              |            |
| <i>D<sub>calc</sub> / g·cm<sup>-3</sup></i>                    | 1.541                                                                                          | 1.536      |
| <i>μ(Mo K<sub>α</sub>) / cm<sup>-1</sup></i>                   | 1.252                                                                                          | 1.248      |
| <i>2θ<sub>max</sub> / deg</i>                                  | 52.738                                                                                         | 52.744     |
| <i>Reflections measured</i>                                    | 39008                                                                                          | 39226      |
| <i>Independent reflections</i>                                 | 13558                                                                                          | 13618      |
| <i>Reflections used</i>                                        | 13558                                                                                          | 13618      |
| <i>R<sub>1</sub><sup>a</sup></i>                               | 0.0528                                                                                         | 0.0516     |
| <i>R<sub>w</sub>(F<sup>2</sup>)<sup>a</sup></i>                | 0.1338                                                                                         | 0.1297     |
| <i>GOF</i>                                                     | 1.045                                                                                          | 1.038      |
| <i>CCDC No.</i>                                                | 2384661                                                                                        | 2384662    |

<sup>a</sup>  $R_1 = \Sigma||F_o| - |F_c|| / \Sigma|F_o|$  and  $R_w = (\Sigma\omega(|F_o| - |F_c|)^2 / \Sigma\omega F_o^2)^{1/2}$ .



**§Table S9.** output file of *PASCal* calculation for crystal **1** between 113 to 133 K.

| Output                |                               |                                     | Direction |          |          |
|-----------------------|-------------------------------|-------------------------------------|-----------|----------|----------|
| Axes                  | $\alpha$ (M K <sup>-1</sup> ) | $\sigma\alpha$ (M K <sup>-1</sup> ) | <i>a</i>  | <i>b</i> | <i>c</i> |
| <i>X</i> <sub>1</sub> | - 18.1210                     | 1.8946                              | 0.4630    | - 0.600  | 0.6525   |
| <i>X</i> <sub>2</sub> | 47.7425                       | 0.2011                              | 0.9470    | 0.1151   | - 0.300  |
| <i>X</i> <sub>3</sub> | 101.3108                      | 0.5615                              | 0.4420    | 0.7936   | 0.4181   |
| V                     | 130.9734                      | 1.5332                              |           |          |          |

  

| % Change in length |                           |                           |                           |                                |                                |                                |
|--------------------|---------------------------|---------------------------|---------------------------|--------------------------------|--------------------------------|--------------------------------|
| <i>T</i> (K)       | <i>X</i> <sub>1</sub> (%) | <i>X</i> <sub>2</sub> (%) | <i>X</i> <sub>3</sub> (%) | <i>X</i> <sub>1,calc</sub> (%) | <i>X</i> <sub>2,calc</sub> (%) | <i>X</i> <sub>3,calc</sub> (%) |
| 113                | 0                         | 0                         | 0                         | 0.0027                         | 0.0003                         | - 0.0008                       |
| 123                | - 0.0101                  | 0.0486                    | 0.0989                    | - 0.0154                       | 0.048                          | 0.1005                         |
| 133                | - 0.0362                  | 0.0955                    | 0.2026                    | - 0.0336                       | 0.0958                         | 0.2018                         |

  

| Volum<br>e   |                            |                                           |
|--------------|----------------------------|-------------------------------------------|
| <i>T</i> (K) | <i>V</i> (Å <sup>3</sup> ) | <i>V</i> <sub>lin</sub> (Å <sup>3</sup> ) |
| 113          | 3255.843                   | 3255.914                                  |
| 123          | 3260.319                   | 3260.178                                  |
| 133          | 3264.372                   | 3264.442                                  |

**§Table S10.** output file of *PASCal* calculation for crystal **1** between 143 to 193 K.

| Output                | Direction                     |                                      |          |          |          |
|-----------------------|-------------------------------|--------------------------------------|----------|----------|----------|
| Axes                  | $\alpha$ (M K <sup>-1</sup> ) | $\sigma \alpha$ (M K <sup>-1</sup> ) | <i>a</i> | <i>b</i> | <i>C</i> |
| <i>X</i> <sub>1</sub> | - 74.1330                     | 6.5341                               | 0.4402   | - 0.5167 | 0.7343   |
| <i>X</i> <sub>2</sub> | 37.1844                       | 0.6950                               | 0.9111   | - 0.1653 | - 0.3776 |
| <i>X</i> <sub>3</sub> | 152.3713                      | 8.3966                               | 0.5755   | 0.7713   | 0.2717   |
| V                     | 114.7932                      | 2.6595                               |          |          |          |

---

**% Change in length**

---

| <i>T</i> / K | <i>X</i> <sub>1</sub> | <i>X</i> <sub>2</sub> | <i>X</i> <sub>3</sub> | <i>X</i> <sub>1, calc</sub> | <i>X</i> <sub>2, calc</sub> | <i>X</i> <sub>3, calc</sub> |
|--------------|-----------------------|-----------------------|-----------------------|-----------------------------|-----------------------------|-----------------------------|
| 143          | 0                     | 0                     | 0                     | 0.0282                      | 0.0035                      | - 0.0315                    |
| 153          | - 0.0413              | 0.0391                | 0.1201                | - 0.0459                    | 0.0407                      | 0.1208                      |
| 163          | - 0.1050              | 0.0889                | 0.2418                | - 0.1200                    | 0.0779                      | 0.2732                      |
| 173          | - 0.1597              | 0.1123                | 0.4101                | - 0.1942                    | 0.1150                      | 0.4256                      |
| 183          | - 0.2595              | 0.1485                | 0.5483                | - 0.2683                    | 0.1522                      | 0.5780                      |
| 193          | - 0.3771              | 0.1900                | 0.7761                | - 0.3424                    | 0.1894                      | 0.7303                      |

---

**Volume**

---

| <i>T</i> / K | <i>V</i> / Å <sup>3</sup> | <i>V</i> <sub>lin</sub> / Å <sup>3</sup> |
|--------------|---------------------------|------------------------------------------|
| 143          | 3255.515                  | 3255.541                                 |
| 153          | 3259.353                  | 3259.278                                 |
| 163          | 3262.857                  | 3263.016                                 |
| 173          | 3267.303                  | 3266.753                                 |
| 183          | 3269.696                  | 3270.490                                 |
| 193          | 3274.580                  | 3274.227                                 |

**§Table S11.** output file of *PASCal* calculation for crystal **1** between 213 to 293 K.

| Output                | Direction                     |                                      |          |          |          |
|-----------------------|-------------------------------|--------------------------------------|----------|----------|----------|
| Axes                  | $\alpha$ (M K <sup>-1</sup> ) | $\sigma \alpha$ (M K <sup>-1</sup> ) | <i>a</i> | <i>b</i> | <i>c</i> |
| <i>X</i> <sub>1</sub> | -104.9990                     | 8.6499                               | -0.3869  | -0.4653  | 0.7961   |
| <i>X</i> <sub>2</sub> | 35.4035                       | 2.6705                               | 0.8997   | 0.2809   | 0.3342   |
| <i>X</i> <sub>3</sub> | 193.7307                      | 1.6950                               | -0.6070  | 0.7617   | 0.2267   |
| V                     | 122.3889                      | 7.3061                               |          |          |          |

| % Change in length |                       |                       |                       |                             |                             |                             |
|--------------------|-----------------------|-----------------------|-----------------------|-----------------------------|-----------------------------|-----------------------------|
| <i>T</i> / K       | <i>X</i> <sub>1</sub> | <i>X</i> <sub>2</sub> | <i>X</i> <sub>3</sub> | <i>X</i> <sub>1, calc</sub> | <i>X</i> <sub>2, calc</sub> | <i>X</i> <sub>3, calc</sub> |
| 213                | 0                     | 0                     | 0                     | -0.0282                     | 0.0013                      | -0.0043                     |
| 233                | -0.2243               | 0.0836                | 0.3619                | -0.2382                     | 0.0721                      | 0.3831                      |
| 253                | -0.4879               | 0.1079                | 0.8051                | -0.4482                     | 0.1430                      | 0.7706                      |
| 273                | -0.7329               | 0.2547                | 1.1353                | -0.6582                     | 0.2138                      | 1.1580                      |
| 293                | -0.7957               | 0.2685                | 1.5506                | -0.8682                     | 0.2846                      | 1.5455                      |

| Volume       |                           |                                          |
|--------------|---------------------------|------------------------------------------|
| <i>T</i> / K | <i>V</i> / Å <sup>3</sup> | <i>V</i> <sub>lin</sub> / Å <sup>3</sup> |
| 213          | 3291.352                  | 3290.371                                 |
| 233          | 3298.603                  | 3298.427                                 |
| 253          | 3305.177                  | 3306.484                                 |
| 273          | 3312.698                  | 3314.540                                 |
| 293          | 3324.587                  | 3322.597                                 |

## §Reference

- S1. G. Steimecke, H.-J. Sieler, R. Kirmse and E. Hoyer, *Phosphorus and Sulfur and the Related Elements*, 1979, **7**, 49–55.
- S2. G. M. Sheldrick, *Acta Cryst A*, 2015, **71**, 3–8.
- S3. O. V. Dolomanov, L. J. Bourhis, R. J. Gildea, J. a. K. Howard and H. Puschmann, *J Appl Cryst*, 2009, **42**, 339–341.
- S4. M. J. Cliffe and A. L. Goodwin, *J Appl Cryst*, 2012, **45**, 1321–1329.
- S5. G. A. Bain and J. F. Berry, *J. Chem. Educ.*, 2008, **85**, 532.
- S6. T. Mori, A. Kobayashi, Y. Sasaki, H. Kobayashi, G. Saito and H. Inokuchi, *Bulletin of the Chemical Society of Japan*, 1984, **57**, 627–633.
